# Supplementary material for: Patient Awareness and Knowledge about Bleeding Risks Associated with Common Dietary Supplements
Source: Research Square preprint supplement (doi:10.21203/rs.3.rs-6909674/v1), 2025-06-20

# Blood Thinning Survey

- Are you taking any vitamins, dietary supplements or herbal/botanical supplements regularly? If yes, please list which ones?  
☐ No ☐ Yes \_\_\_\_\_
- Are you taking any prescription blood thinning medications or aspirin or over-the-counter or prescribed nonsteroidal anti-inflammatory drugs (like ibuprofen, naproxen, meloxicam, celecoxib or others)? If yes, please list which one(s)?  
☐ No ☐ Yes \_\_\_\_\_
- How many alcoholic drinks do you have in a week?  
☐ None ☐ 1-3 drinks ☐ 4-7 drinks ☐ 8+ drinks  
(1 alcoholic drink is roughly equivalent to 1 can of beer, 5 ounces of wine, 1.5 ounces of 80 proof liquor)
- Have you had a skin biopsy or surgery before? s)?  
☐ No ☐ Yes
- After a skin biopsy or surgery have you had any issues:  
☐ Bleeding after my biopsy or surgery  
☐ Lots of bruising after my biopsy or surgery  
☐ Took a long time to heal after biopsy or surgery  
☐ other – please specify \_\_\_\_\_

- Mark if the following products (either on their own or by interaction with other medications) may increase the risk of bleeding?

|                                                |                           |                          |
|------------------------------------------------|---------------------------|--------------------------|
| <input type="radio"/> Fish oil and derivatives | <input type="radio"/> Yes | <input type="radio"/> No |
| <input type="radio"/> Flaxseed Oil             | <input type="radio"/> Yes | <input type="radio"/> No |
| <input type="radio"/> Evening Primrose Oil     | <input type="radio"/> Yes | <input type="radio"/> No |
| <input type="radio"/> Garlic                   | <input type="radio"/> Yes | <input type="radio"/> No |
| <input type="radio"/> Hawthorn                 | <input type="radio"/> Yes | <input type="radio"/> No |
| <input type="radio"/> Ginseng                  | <input type="radio"/> Yes | <input type="radio"/> No |
| <input type="radio"/> Vitamin E                | <input type="radio"/> Yes | <input type="radio"/> No |
| <input type="radio"/> Homocysteine             | <input type="radio"/> Yes | <input type="radio"/> No |
| <input type="radio"/> Vitamin K                | <input type="radio"/> Yes | <input type="radio"/> No |
| <input type="radio"/> Ginger                   | <input type="radio"/> Yes | <input type="radio"/> No |
| <input type="radio"/> Gingko                   | <input type="radio"/> Yes | <input type="radio"/> No |
| <input type="radio"/> Coq10                    | <input type="radio"/> Yes | <input type="radio"/> No |
| <input type="radio"/> Melatonin                | <input type="radio"/> Yes | <input type="radio"/> No |
| <input type="radio"/> Red Clover               | <input type="radio"/> Yes | <input type="radio"/> No |

- Drinking alcohol can impair blood clotting and increase the risk of excess bleeding. ☐ True ☐ False
- Which of these common mineral supplements (either on their own or by interaction with other medications) may increase the risk of bleeding?  
☐ Iron ☐ Calcium ☐ Magnesium
- The following supplements are often taken to improve blood sugar management. Please mark if the supplement (either on their own or by interaction with other medications) may increase the risk of bleeding.
 

|                                                            |                           |                          |
|------------------------------------------------------------|---------------------------|--------------------------|
| <input type="radio"/> Chromium Picolinate                  | <input type="radio"/> Yes | <input type="radio"/> No |
| <input type="radio"/> Cinnamon                             | <input type="radio"/> Yes | <input type="radio"/> No |
| <input type="radio"/> Alpha Lipoic Acid                    | <input type="radio"/> Yes | <input type="radio"/> No |
| <input type="radio"/> Curcumin (Turmeric)                  | <input type="radio"/> Yes | <input type="radio"/> No |
| <input type="radio"/> Green tea & Epigallocatechin gallate | <input type="radio"/> Yes | <input type="radio"/> No |
| <input type="radio"/> Flax seed                            | <input type="radio"/> Yes | <input type="radio"/> No |
| <input type="radio"/> Berberine                            | <input type="radio"/> Yes | <input type="radio"/> No |
| <input type="radio"/> Magnesium                            | <input type="radio"/> Yes | <input type="radio"/> No |
| <input type="radio"/> Ashwagandha                          | <input type="radio"/> Yes | <input type="radio"/> No |
| <input type="radio"/> Resveratrol                          | <input type="radio"/> Yes | <input type="radio"/> No |
- These over-the-counter products are often taken for arthritis pain or to reduce inflammation. Please mark if the supplement (either on their own or by interaction with other medications) may increase the risk of bleeding.
 

|                                                      |                           |                          |
|------------------------------------------------------|---------------------------|--------------------------|
| <input type="radio"/> Ibuprofen                      | <input type="radio"/> Yes | <input type="radio"/> No |
| <input type="radio"/> Naproxen                       | <input type="radio"/> Yes | <input type="radio"/> No |
| <input type="radio"/> Turmeric (curcumin)            | <input type="radio"/> Yes | <input type="radio"/> No |
| <input type="radio"/> Glucosamine/Chondroitin        | <input type="radio"/> Yes | <input type="radio"/> No |
| <input type="radio"/> Omega 3 fatty acids            | <input type="radio"/> Yes | <input type="radio"/> No |
| <input type="radio"/> Aspirin or Willow Bark Extract | <input type="radio"/> Yes | <input type="radio"/> No |
| <input type="radio"/> Capsaicin                      | <input type="radio"/> Yes | <input type="radio"/> No |
| <input type="radio"/> Green Tea Extract              | <input type="radio"/> Yes | <input type="radio"/> No |
| <input type="radio"/> Cannabidiol (CBD)              | <input type="radio"/> Yes | <input type="radio"/> No |
| <input type="radio"/> Cannabis (THC) products        | <input type="radio"/> Yes | <input type="radio"/> No |
| <input type="radio"/> Collagen                       | <input type="radio"/> Yes | <input type="radio"/> No |
| <input type="radio"/> Feverfew                       | <input type="radio"/> Yes | <input type="radio"/> No |

- These supplements are often taken to improve urinary or digestive health. Please mark if the supplement (either on their own or by interaction with other medications) may increase the risk of bleeding.
 

|                                                                |                           |                          |
|----------------------------------------------------------------|---------------------------|--------------------------|
| <input type="radio"/> Saw palmetto                             | <input type="radio"/> Yes | <input type="radio"/> No |
| <input type="radio"/> Dong quai (Angelica sinensis)            | <input type="radio"/> Yes | <input type="radio"/> No |
| <input type="radio"/> Probiotics                               | <input type="radio"/> Yes | <input type="radio"/> No |
| <input type="radio"/> Digestive enzymes (papain and bromelain) | <input type="radio"/> Yes | <input type="radio"/> No |
| <input type="radio"/> Aloe                                     | <input type="radio"/> Yes | <input type="radio"/> No |
| <input type="radio"/> Taurine                                  | <input type="radio"/> Yes | <input type="radio"/> No |
| <input type="radio"/> Psyllium                                 | <input type="radio"/> Yes | <input type="radio"/> No |
- These supplements are often taken to improve immunity. Please mark if the supplement (either on their own or by interaction with other medications) may increase the risk of bleeding.
 

|                                                  |                           |                          |
|--------------------------------------------------|---------------------------|--------------------------|
| <input type="radio"/> Echinacea                  | <input type="radio"/> Yes | <input type="radio"/> No |
| <input type="radio"/> Quercetin                  | <input type="radio"/> Yes | <input type="radio"/> No |
| <input type="radio"/> Nattokinase                | <input type="radio"/> Yes | <input type="radio"/> No |
| <input type="radio"/> Niacinamide (Nicotinamide) | <input type="radio"/> Yes | <input type="radio"/> No |
| <input type="radio"/> Feverfew                   | <input type="radio"/> Yes | <input type="radio"/> No |
| <input type="radio"/> N-Acetyl Cysteine          | <input type="radio"/> Yes | <input type="radio"/> No |
- These products are commonly used to help improve sleep or anxiety. Please mark if the supplement (either on their own or by interaction with other medications) may increase the risk of bleeding.
 

|                                       |                           |                          |
|---------------------------------------|---------------------------|--------------------------|
| <input type="radio"/> Melatonin       | <input type="radio"/> Yes | <input type="radio"/> No |
| <input type="radio"/> St John's Wort  | <input type="radio"/> Yes | <input type="radio"/> No |
| <input type="radio"/> Chamomile       | <input type="radio"/> Yes | <input type="radio"/> No |
| <input type="radio"/> Magnesium       | <input type="radio"/> Yes | <input type="radio"/> No |
| <input type="radio"/> Diphenhydramine | <input type="radio"/> Yes | <input type="radio"/> No |

## Demographic Information:

- How old are you? \_\_\_\_\_ years old ☐ Prefer not to answer
- How do you describe yourself?  
☐ Male  
☐ Female  
☐ Non-binary  
☐ Prefer not to answer
- Which ethnicity describes you? Please check all that apply  
☐ White/ Caucasian  
☐ Hispanic or Latino  
☐ Black or African American  
☐ Asian/ Pacific Islander  
☐ Native American or Alaskan Native  
☐ Multiple ethnicities or Mixed \_\_\_\_\_  
☐ Prefer not to answer
- Do you think being given this information about the blood thinning potential of over-the-counter supplements BEFORE procedures would be helpful?  
☐ Yes  
☐ No
- How do you like to receive health education information? Choose all that apply.  
☐ Written pamphlet  
☐ Video format  
☐ Email or text reminders

Thank you for taking this survey.

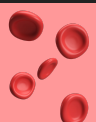

Supplement: Supplementary file 2 [file 787e3b93f6b110f342e4d0bd.pdf]
